# Supplementary material
Source: PubMed Central journal article supplement (PMC5696080)
Supplement: NIHMS878870-supplement-2.pdf [file NIHMS878870-supplement-2.pdf]

## Supplementary Figure 2

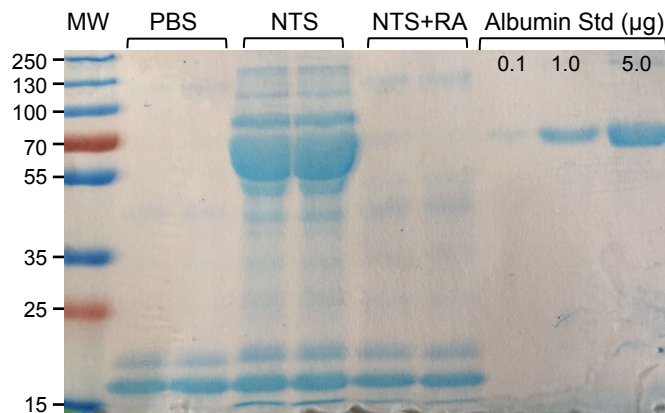

**RA treatment reduces albuminuria in NTS-injected mice.** Coomassie blue-stained gel of 2 $\mu$ l of urine samples collected 7 days post PBS or NTS injection (2 mice per group) shows significant decrease in albumin in RA-treated mice. MW, molecular weight markers in kDa are shown on the left; albumin standards in increasing concentrations are shown on the right .
