# Supplementary material
Source: PubMed Central journal article supplement (PMC5696080)
Supplement: NIHMS878870-supplement-4.pdf [file NIHMS878870-supplement-4.pdf]

## Supplementary Figure 4

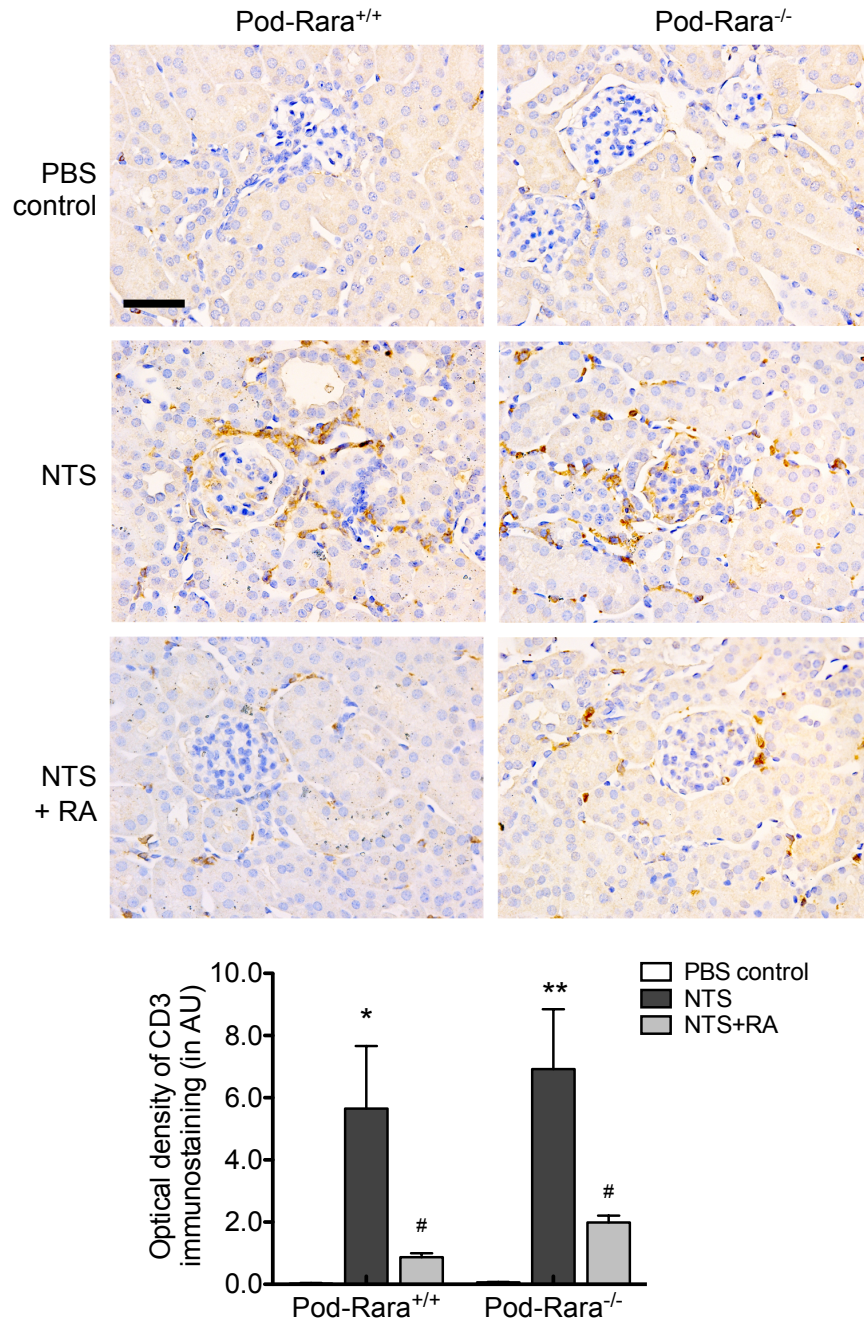

**T-cell marker CD3 expression in glomeruli of NTS-injected mice with or without RA treatment.** Immunostaining of CD3 was detected in NTS-injected kidneys and not in PBS control kidneys. RA treatment significantly decreased their expression in both Pod-Rara<sup>+/+</sup> and Pod-Rara<sup>+/+</sup> kidneys. (a) Representative 200x images of Pod-Rara<sup>+/+</sup> and Pod-Rara<sup>+/+</sup> kidneys. Scale bar represents 50 $\mu$ m. (b) Optical density of CD3 immunostaining intensity. AU, arbitrary units (\* $P$ <0.05 and \*\* $P$ <0.01, compared to respective PBS control; # $P$ <0.05, compared to respective NTS-injected; n=6).
