# Supplementary material
Source: PubMed Central journal article supplement (PMC5696080)
Supplement: NIHMS878870-supplement-5.pdf [file NIHMS878870-supplement-5.pdf]

## Supplementary Figure 5

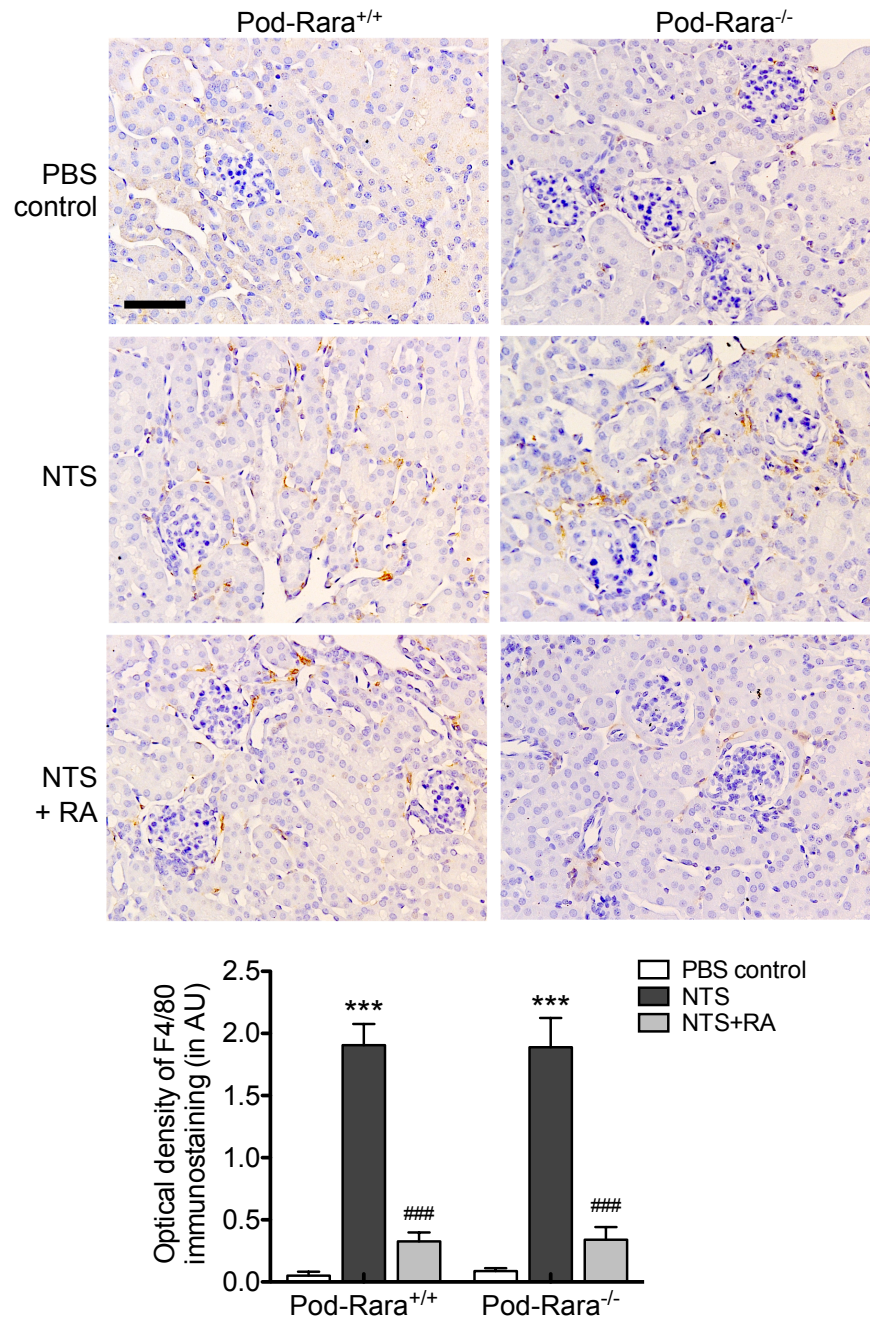

**Macrophage F4/80 expression in glomeruli of NTS-injected mice with or without RA treatment.** Immunostaining of F4/80 was detected in NTS-injected kidneys and not in PBS control kidneys. RA treatment significantly decreased their expression in both Pod-Rara<sup>+/+</sup> and Pod-Rara<sup>-/-</sup> kidneys. (a) Representative 200x images of Pod-Rara<sup>+/+</sup> and Pod-Rara<sup>-/-</sup> kidneys. Scale bar represents 50 $\mu$ m. (b) Optical density of F4/80 immunostaining intensity. AU, arbitrary units (\*\*\* $P$ <0.001, compared to respective PBS control; ### $P$ <0.001, compared to respective NTS-injected;  $n$ =6).
