# Supplementary material
Source: PubMed Central journal article supplement (PMC5696080)
Supplement: NIHMS878870-supplement-7.pdf [file NIHMS878870-supplement-7.pdf]

## Supplementary Table 1

### Patient Characteristics

|                                      | Anti-GBM GN |           | Crescentic IgA Nephropathy |           |           | MCD       |           |           |
|--------------------------------------|-------------|-----------|----------------------------|-----------|-----------|-----------|-----------|-----------|
|                                      | Patient 1   | Patient 2 | Patient 1                  | Patient 2 | Patient 3 | Patient 1 | Patient 2 | Patient 3 |
| Age                                  | 60          | 44        | 6                          | 75        | 48        | 10        | 61        | 43        |
| Gender                               | Female      | Female    | Female                     | Male      | Female    | Male      | Female    | Male      |
| Serum Creatine ( $\mu\text{mol/L}$ ) | 920         | 445       | 62                         | 168       | 186       | 44        | 53        | 105       |
| BUN ( $\text{mmol/L}$ )              | 23          | 12        | 8                          | 30        | 50        | 18        |           | 14        |
| albumin ( $\text{g/dL}$ )            | 2.6         | 3.2       | 4.0                        | 3.1       |           | 2.5       | 2.3       | 1.3       |
| anti-GBM antibody titer (RU/ml)      | 58.1        | >200      | negative                   | negative  | negative  | negative  | negative  | negative  |
| % cellular crescents                 | 80%         | 80%       | 23%                        | 25%       | 19%       | N/A       | N/A       | N/A       |
| % global sclerosis                   | 7%          | 21%       | 23%                        | 19%       | 65%       | N/A       | N/A       | N/A       |
