# Supplementary material
Source: PubMed Central journal article supplement (PMC5696080)
Supplement: NIHMS878870-supplement-8.pdf [file NIHMS878870-supplement-8.pdf]

## Supplementary Table 2

Real-time PCR primer sequences

| <b>Gene</b> | <b>Forward</b>               | <b>Reverse</b>                |
|-------------|------------------------------|-------------------------------|
| Claudin-1   | 5'-GCGTTTCGCAAAGCACCGGG-3'   | 5'-GCCACTAATGTCGCCAGACCTGA-3' |
| CD44        | 5'-ACCTTGGCCACCATTGCCTCA-3'  | 5'-TGGGCTTCTTGCCTCTTGGGTG-3'  |
| Ki-67       | 5'-TGAGCCTGTGAGGCTGAGACAT-3' | 5'-TCCCCATCAGGGTCAGCACAGAA-3' |
| nephrin     | 5'-GTGCCCTGAAGGACCCTACT-3'   | 5'-CCTGTGGATCCCTTTGACAT-3'    |
| synptopodin | 5'-GCCAGGGACCAGCCAGATA-3'    | 5'-AGGAGCCCAGGCCTTCTCT-3'     |
| GAPDH       | 5'-GCCATCAACGACCCCTTCAT-3'   | 5'-ATGATGACCCGTTTGGCTCC-3'    |
